# Supplementary material for: A new heavy lanthanide-dependent DNAzyme displaying strong metal cooperativity and unrescuable phosphorothioate effect
Source: PubMed Central journal article supplement (PMC4288186; doi:10.1093/nar/gku1296), 2014-12-08
Supplement: supp_gku1296_nar-03117-f-2014-File009.pdf [file supp_gku1296_nar-03117-f-2014-File009.pdf]

# Supplementary Data

## **A New heavy lanthanide-dependent DNzyme displaying strong metal cooperativity and unrescuable phosphorothioate effect**

Po-Jung Jimmy Huang, Mahsa Vazin, Zaneta Matuszek and Juewen Liu\*

Department of Chemistry, Waterloo Institute for Nanotechnology, University of Waterloo,  
Ontario, Canada, N2L 3G1

E-mail: [liujw@uwaterloo.ca](mailto:liujw@uwaterloo.ca)

**Table S1.** DNA oligonucleotides used for in vitro selection and assays.

| <b>DNA Name</b>         | <b>Sequence and modifications (from 5' to 3')</b>       |
|-------------------------|---------------------------------------------------------|
| Lib-FAM-N <sub>35</sub> | pGGCGAAACATCTTN <sub>35</sub> TAGTGGGTAAGCTTGGCAC-FAM   |
| Lib-rA                  | AATACGAGTCACTATrAGGAAGAT                                |
| splint                  | AAGATGTTTCGCCATCTTCCTATAGTCCACCACCA                     |
| P1 primer               | GTGCCAAGCTTACCG                                         |
| P2 primer               | CTGCAGAATTCTAATACGAGTCACTATAGGAAGATGGCGAAACA            |
| P3 primer               | <b>FAM-AAATGATCCACTAATACGACTCACTATrAGG</b>              |
| P4 primer               | AACAACAACAAC-iSp18-GTGCCAAGCTTACCG                      |
| Tm4                     | TTTCGCCATCTTCAAATTCAGTCTGACTCGTGAC                      |
| Tm7                     | TTTCGCCATCTTCGATACTCTCTTTGACTCGTGAC                     |
| Tm8                     | TTTCGCCATCTTCATACACGTTTTTTTA ACTCGTGAC                  |
| Er32                    | TTTCGCCATCTTTTGTACATTGATCTGACTCGTGAC                    |
| Er36                    | TTTCGCCATCTTCTAAACGTACATCATCTCTAACTCGTGAC               |
| Ho11                    | TTTCGCCATCTTCTAAAATTCCTCTAACTCGTGAC                     |
| Ho15                    | TTTCGCCATCTTCTAATAATTCTTTTAACTCGTGAC                    |
| RNA-sub                 | GTCACGAGTCACrUrArUrArGrGrAAGATGGCGAAA-FAM               |
| Sub-FAM                 | GTCACGAGTCACTATrAGGAAGATGGCGAAA-FAM                     |
| Tm7-Q                   | <b>Iowa Black® FQ</b> -CGCCATCTTCGATACTCTCTTTGACTCGTGAC |

**Table S2.** Sequence alignment for the three selection (aligned together).

|      |                                                                                |    |
|------|--------------------------------------------------------------------------------|----|
| Ho7  | CTGCAG-AATTCTAATACGAGTCACTATA <b>A</b> GGGAAGATGGCGAAACATCT-----TAG--A-        | 51 |
| Ho13 | CTGCAG-AATTCTAATACGAGTCACTATAGGAAGATGGCGAAACATCT-----TAG--A-                   | 51 |
| Ho14 | CTGCAG-AATTCTAATACGAGTCACTATAGGAAGATGGCGAAACATCT-----TAG--A-                   | 51 |
| Er5  | CTGCAG-AATTCTAATACGAGTCACTATAGGAAGATGGCGAAACATCT-----TTGG-C-                   | 52 |
| Er1  | CTGCAG-AATTCTAATACGAGTCACTATAGGAAGATGGCGAAACATCT-----TCGAGA-                   | 53 |
| Er16 | CTGCAG-AATTCTAATACGAGTCACTATAGGAAGATGGCGAAACATCT-----T--AGA-                   | 51 |
| Er18 | CTGCAG-AATTCTAATACGAGTCACTATAGGAAGATGGCGAAACATCT-----TGA--T-                   | 51 |
| Er39 | CTGCAG-AATTCTAATAC-----CTATAGGAAGATGGCGAAACATCT-----TGA--T-                    | 45 |
| Er11 | CTGCAG-AATTCTAATACGAGTCACTATAGGAAGATGGCGAAACATCT-----TGA--T-                   | 51 |
| Tm4  | CTGCAG-AATTCTAATACGAGTCACTATAGGAAGATGGCGAAACATCT-----TCA--A-                   | 51 |
| Tm7  | CTGCAG-AATTCTAATACGAGTCACTATAGGAAGATGGCGAAACATCT-----TCG--A-                   | 51 |
| Tm26 | CTGCAG-AATTCTAATACGAGTCACTATAGGAAGATGGCGAAACATCT-----TAA--A-                   | 51 |
| Ho12 | CTGCAG-AATTCTAATACGAGTCACTATAGGAAGATGGCGAAACATCT-----TATATG-                   | 53 |
| Tm27 | CTGCAG-AATTCTAATACGAGTCACTATAGGAAGATGGCGAAACATCT-----TCTATG-                   | 53 |
| Ho9  | CTGCAG-AATTCTAATACGAGTCACTATAGGAAGATGGCGAAACATCT-----TCAGTA-                   | 53 |
| Er34 | CTGCAG-AATTCTAATACGAGTCACTATAGGAAGATGGCGAAACATCT-----TCGAAAG                   | 54 |
| Tm14 | CTGCAG-AATTCTAATA-GAGTCACTAT-GGAAGATGGCGAAACATCT-----TCAAAA-                   | 51 |
| Ho2  | CTGCAG-AATTCTAATACGAGTCACTATAGGAAGATGGCGAAACATCT-----TAGCTC-                   | 53 |
| Er22 | CTGCAG-AATTCTAATACGAGTCACTATAGGAAGATGGCGAAACATCTTC--TAGAAT-                    | 55 |
| Ho6  | CTGCAG-AATTCTAATACGAGTCACTATAGGAAGATGGCGAAACATCT-----TAATAA-                   | 53 |
| Er32 | CTGCAG-AATTCTAATACGAGTCACTATAGGAAGATGGCGAAACATCT-----TTTGTA-                   | 53 |
| Er24 | CTGCAG-AATTCTAATACGAGTCACTATAGGAAGATGGCGAAACATCT-----TTAAACA                   | 54 |
| Er30 | CTGCAG-AATTCTAATACGAGTCACTATAGGAAGATGGCGAAACATCT-----TTAAA--                   | 52 |
| Ho4  | CTGCAG-AATTCTAATACGAGTCACTATAGGAAGATGGCGAAACATCT-----TCAAT--                   | 52 |
| Ho11 | CTGCAG-AATTCTAATACGAGTCACTATAGGAAGATGGCGAAACATCT-----TCTAA--                   | 52 |
| Er36 | CTGCAG-AATTCTAATACGAGTCACTATAGGAAGATGGCGAAACATCT-----TTAAA--                   | 52 |
| Er4  | CTGCAG-AATTCTAATACGAGTCACTATAGGAAGATGGCGAAACATCT-----TAGTA--                   | 52 |
| Tm16 | CTGCAG-AATTCTAATACGAGTCACTATAGGAAGATGGCGAAACATCT-----TAAGA--                   | 52 |
| Tm32 | CTGCAG-AATTCTAATACGAGTCACTATAGGAAGARGGCGAAACATCT-----TAAGA--                   | 52 |
| Er23 | CTGCAG-AATTCTAATACGAGTCACTATAGGAAGATGGCGAAACATCT-----TCAAAC                    | 54 |
| Ho15 | CTGCAG-AATTCTAATACGAGTCACTATAGGAAGATGGCGAAACATCT-----TCAATA                    | 54 |
| Tm8  | CTGCAG-AATTCTAATACGAGTCACTATAGGAAGATGGCGAAACATCT-----TCATACA                   | 54 |
| Ho1  | CTGCAG-AATTCTAATACGAGTCACTATAGGAAGATGGCGAAACATCT-----TAGAGGT                   | 54 |
| Er6  | CTGCAG-AATTCTAATACGAGTCACTATAGGAAGATGGCGAAACATCT-----TAGA---                   | 51 |
| Er13 | CTGCAG-AATTCTAATACGAGTCACTATAGGAAGATGGCGAAACATCT-----TCGAAAA                   | 54 |
| Er31 | CTGCAG-AATTCTAATACGAGTCACTATAGGAAGATGGCGAAACATCTTT---ATAGGTAA                  | 56 |
| Er25 | CTGCAG-AATTCTAATACGAGTCACTATAGGAAGATGGCGAAACATCT-----TGGAGA                    | 53 |
| Er35 | CTGCAG-AATTCTAATACGAGTCACTATAGGAAGATGGCGAAACATCTTAGGGGTAGTGC                   | 59 |
| Tm17 | CTGCAG-AATTCTAATACGAGTCACTATAGGAAGATGGCGAAACATCTTT--GAGAAGCAC                  | 57 |
| Er12 | CTGCAG-AATTCTAATACGAGTCACTATAGGAAGATGGCGAAACATCTTT----G--TATA                  | 53 |
| Er26 | CTGCAG-AATT- <b>T</b> AATACGAGTCACTATAGGAAGATGGCGAAACATCTTT----CGACATA         | 54 |
| Er27 | CTGCAG-AATTCTAATACGAGTCACTATAGGAAGATGGCGAAACATCTTT----TTATAGA                  | 55 |
| Er33 | CGCCCTTAATTCTAATACGAGTCACTATAGGAAGATGGCGAAACATCTTT----TTATAGA                  | 56 |
| Tm1  | CTGCAG-AATTCTAATACGAGTCACTATAGGAAGATGGCGAAACATCTTG---TACAAGA                   | 56 |
| Er9  | CTGCAG-AATTCTAATACGAGTCACTATAGGAAGATGGCGAAACATCTTT---- <b>TACAAGC</b>          | 55 |
| Er20 | CTGCAG-AATTCTAATACGA- <b>T</b> CACTATAGGAAGATGGCGAAACATCTTT---- <b>TACAAGC</b> | 54 |
| Er10 | CTGCAG-AATTCTAATACGAGTCACTATAGGAAGATGGCGAAACATCTTT---- <b>TACAAGC</b>          | 55 |
| Tm3  | CTGCAG-AATTCTAATACGAGTCACTATAGGAAGATGGCGAAACATCTTT---- <b>TACAAGC</b>          | 55 |
| Tm22 | CTGCAG-AATTCTAATACGAGTCACTATAGGAAGATGGCGAAACATCTTT---- <b>TACAAGC</b>          | 55 |
| Er37 | CTGCAG-AATTCTAATACGAGTCACTATAGGAAGATGGCGAAACATCTTT---- <b>TACAAGC</b>          | 55 |
| Ho3  | CTGCAG-AATTCTAATACGAGTCACTATAGGAAGATGGCGAAACATCTTT---- <b>TACAAGC</b>          | 55 |
| Ho10 | CTGCAG-AATTCTAATACGAGTCACTATAGGAAGATGGCGAAACATCTTT---- <b>TACAAGC</b>          | 55 |
| Er2  | CTGCAG-AATTCTAATACGAGTCACTATAGGAAGATGGCGAAACATCTTT---- <b>TACAAGG</b>          | 55 |
| Er17 | CTGCAG-AATTCTAATACGAGTCACTATAGGAAGATGGCGAAACATCTTT---- <b>TACAAGG</b>          | 55 |
| Er28 | CTGCAG-AATTCTAATACGAGTCACTATAGGAAGATGGCGAAACATCTTT---- <b>TACAAGG</b>          | 55 |
| Ho8  | CTGCAG-AATTCTAATACGAGTCACTATAGGAAGATGGCGAAACATCTTT---- <b>TACAAGG</b>          | 55 |
| Er19 | CTGCAG-AATTCTAATACGAGTCACTATAGGAAGATGGCGAAACATCTTT---- <b>TACAAGG</b>          | 55 |
| Er38 | CTGCAG-AATTCTAATACGAGTCACTATAGGAAGATGGCGAAACATCTTT---- <b>TACAAGG</b>          | 55 |
| Ho5  | CTGCAG-AATTCCAATACGAGTCACTATAGGAAGATGGCGAAACATCTTT---- <b>TACGAGA</b>          | 55 |
| Er15 | CTGCAG-AATTCTAATACGAGTCACTATAGGAAGATGGCGAAACATCTTT----TGTATAC                  | 55 |

```

Ho7      -AATTTTC-----TATAACGAGTTTGAT-CATGTACCGTTAGT--CGGTAAGCTTG 98
Ho13     -AATTTTC-----TATAACGAGTTTGAT-CATGTACCGTTAGT--CGGTAAGCTTG 98
Ho14     -AATTTTC-----TATAACGAGTTTGAT-CATGTACCGTTAGT--CGGTAAGCTTG 98
Er5      -AAATCTC-----TTTAACGAATTTAGT-AGTGTACCG-TAGT--CGGTAAGCTTG 98
Er1      -TGATTTA-----TATAACGAGTAAAGG-ACCGA--TTGTAGT--CGGTAAGCTTG 98
Er16     -CAAATTA-----TATAACGAGTATAGG-AGCGAGCACATAGT--CGGTAAGCTTG 98
Er18     -TCT-CTC-----TTTAACGAGTATCAGTGGCTRCAACGTAGT--CGGTAAGCTTG 98
Er39     -TCT-CTC-----TTTAACGAGTATCAGTGGCTCCAACGTAGT--CGGTAAGCTTG 92
Er11     -TCT-CTC-----TCTAACGAGTATCAGTGGCTCCACCGTAGT--CGGTAAGCTTG 98
Tm4      -AATTCAG-----TCTGACGCG-GTAGGTGGGTCCACCATAGT--CGGTAAGCTTG 98
Tm7      -TACTCTC-----TTTGACGTTTCGTATAAACGAGACA-ATAGT--CGGTAAGCTTG 98
Tm26     -TATAATC-----TTTAACG--AGTAACCCAGACACATATAGT--CGGTAAGCTTG 97
Ho12     -ATATCT-----TTTAACGAGTATTAA--ACCATAAGATAGT--CGGTAAGCTTG 98
Tm27     -TTACTA-----TCTAACGAGAAGAGA--ACCATAA-CTAG---CGGTAAGCTTG 96
Ho9      -CCATCAA-----TCTAACGAGTGTAG--AACGCAA-ATAGT--CGGTAAGCTTG 98
Er34     CAAATTTA-----TTTGACGAGAAT-----GCATACAAACAGT--CGGTAAGCTTG 98
Tm14     ---TTTAC-----TATAACGAGTGTTTA--ACGTGGAAATTAG--CGGTAAGCTTG 95
Ho2      ---AATCA-----GCACGATGCGTGATT-ATAGTGAAG-TAGT--CGGTAAGCTTG 98
Er22     ---CATTT-----ATTTGACCACG-GATT-GCAGATTA--TAG---CGGTAAGCTTG 97
Ho6      ---CTTT-----ATCTAACGAAGTATTA-CTCAAAGAGGTAGT--CGGTAAGCTTG 98
Er32     ---CATTG-----ATCTGACTCACTCATG-CT-GTGGACCTAGT--CGGTAAGCTTG 98
Er24     GGAATTTTC-----TTTAACTCGCTGTAG-GTG-GACT---AGT--CGGTAAGCTTG 98
Er30     --ACTTTA-----TTTGACTCGGAGGAA-GAG-AATTGGTAGT--CGGTAAGCTTG 97
Ho4      --TTATTC-----TTTGATGAGAAAAAG-GTGGAACTATTAGT--CGGTAAGCTTG 98
Ho11     -AATTC-----CTCTAACTCGTACAAT-GAC-CCTTGTTAGT--CGGTAAGCTTG 98
Er36     -CGTACAT-----CATCTCTAACTCGTTGATA-GAA-C-----TTAGT--CGGTAAGCTTG 98
Er4      -CCCAAAGGGAGGATGTTATAACTCGTATCT-----C-----TAGT--CGGTAAGCTTG 98
Tm16     GCCGTCAG-----GTATGCCCTGTCAAAA-ACT-CGT--ATAGT--CGGTAAGCTTG 98
Tm32     GCCGTCAG-----GTATGCCCTGTCAAAA-ACT-CGT--ATAGT--CGGTAAGCTTG 98
Er23     GATATCAG-----AAGATCAACTCTATA-ACT-CG---TAGT--CGGTAAGCTTG 98
Ho15     A-TTCTTT-----TAACTCGATTATG-TAG-CGTATATAG--CGGTAAGCTTG 97
Tm8      CGTTTTTT-----TAACTCGCT-ATG-TAT-GGAAGGTAG--CGGTAAGCTTG 97
Ho1      ACGTATAG-----AGACGAG-GTGACGCAATT----GAGTAGT--CGGTAAGCTTG 98
Er6      ---TATGG-----AAACGATTGTGAGGCTATATGACGAGGTAG--CGGTAAGCTTG 97
Er13     AGGTATCT-----GAGTTTATTTGATTTCGTTG----AT-TAGT--CGGTAAGCTTG 98
Er31     TGGAAACT-----AA---TATTTGACTCGCTG----ATATAGT--CGGTAAGCTTG 98
Er25     GAGAAACT-----CAATTTATTTGACTCAATG----GGTTAGT--CGGTAAGCTTG 98
Er35     GTAGGACG-----AGATTTATTTGGCTCGTAG-----CGGTAAGCTTG 97
Tm17     GAAGTGC-----AGGTTTATTTGACAAATAAT-----AGT--CGGTAAGCTTG 98
Er12     ACTTAAGT-----AGGTTATTTTAAACGAGTATT----ATTAGT--CGGTAAGCTTG 98
Er26     ACGAATGT-----TACCCCTTTTAAACGAGTA-----ATTAGC--CGGTAAGCTTG 97
Er27     TCGATAGA-----GGATTTATTTGACAGGTAT-----TTAGT--CGGTAAGCTTG 98
Er33     TCGATAGA-----GGATTTATTTGACAGGTAT-----T-AGT--CGGTAAGCTTG 98
Tm1      ACGGGAGA-----GGGTATATTTAAATCGTAG-----T--AG--CGGTAAGCTTG 97
Er9      ATCAGTAG-----ATTGGAATGCGGTT-----ATAGTGACGGTAAGCTTG 96
Er20     ATCAGTAG-----ATTGGAATGCGGTT-----ATAGTGACGGTAAGCTTG 95
Er10     ATCAGTAG-----ATTGGAATGCGGTT-----ATAGTGACGGTAAGCTTG 96
Tm3      ATCAGTAG-----ATTGGAATGCGGTT-----ATAGTGACGGTAAGCTTG 96
Tm22     ATCAGTAG-----ATTGGAATGCGGTT-----ATAGTGACGGTAAGCTTG 96
Er37     ATCAGTAG-----ATTGGAATGCGGTT-----ATAGTGACGGTAAGCTTG 96
Ho3      ACAAATAG-----ATTGGAATGCGGTT-----ATAGTGACGGTAAGCTTG 96
Ho10     ACCGGACA-----AACTATGGGAGGAGCGGTT-----ATAGT--CGGTAAGCTTG 98
Er2      AAGGGTCC-----A---CTATGCACAACGGTT-----ATAGTGACGGTAAGCTTG 97
Er17     AAGGGTCC-----A---CTATGCACAACGGTT-----ATAGTGACGGTAAGCTTG 97
Er28     AAGGGTCC-----A---CTATGCACAACGGTT-----ACAGTGACGGTAAGCTTG 97
Ho8      AAGGGTCC-----A---CTATGCACAACGGTT-----GTAGTGACGGTAAGCTTG 97
Er19     AAGGGTCC-----A---CTATGCACAACGGTT-----ATAGTGGCGGTAAGCTTG 97
Er38     AAGTGTCC-----A---CTATGCACAACGGTT-----ATAGTGACGGTAAGCTTG 97
Ho5      TAGAATGT-----TG--TACAGTCTAGCGGTT-----ATAGT--CGGTAAGCTTG 96
Er15     CGGAAAGG-----TAAATTAATTTAACGAGA-----GTAGT--CGGTAAGCTTG 98

```

**Note:** the bold A in red is the cleavage site. The bases in blue are conserved for Lu12. The green T denotes for the starting of the sequence alignment in the randomized region.

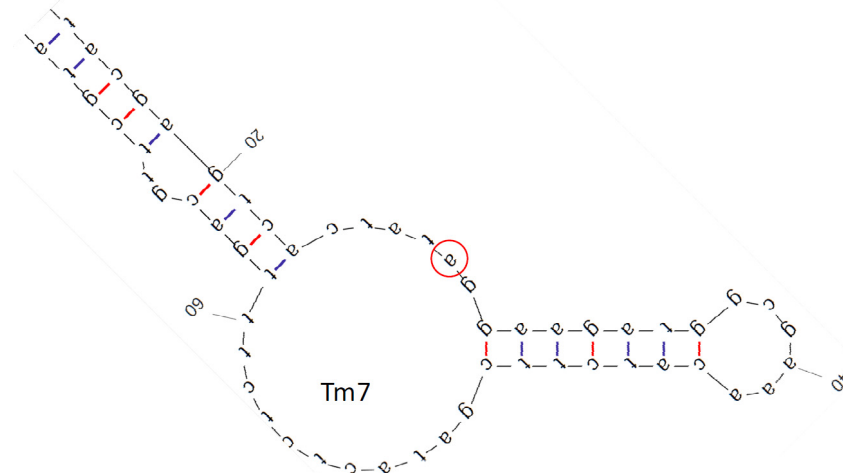

**Figure S1.** M-fold predicted Tm7 secondary structure in the cis-cleaving form. The numbering starts from the 5'-end of the sequence. The cleavage site rA is marked in the red circle. To engineer this into a trans-cleaving DNAzyme, the loop around nucleotide number 40 is removed and the base pairs are fixed as shown in Figure 1E of the main paper.

We tested a total of seven sequences in the family and six of them showed activity as presented in the paper. The last one, Tm8, is put here in SI due to limited space. The trans-cleaving Tm8 is presented in Figure S2A, which also has the pyrimidine stretch followed by a mixed purines and pyrimidines. However, it is also active active with the heavy lanthanides but not the lighter ones (Figure S2B).

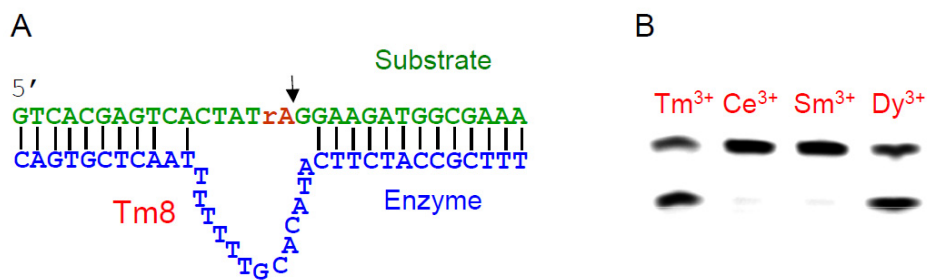

**Figure S2.** (A) The secondary structure of the trans-cleaving Tm8 DNAzyme. (B) Its activity in the presence of four lanthanides. Again, only the heavy lanthanides Tm<sup>3+</sup> and Dy<sup>3+</sup> produced activity.

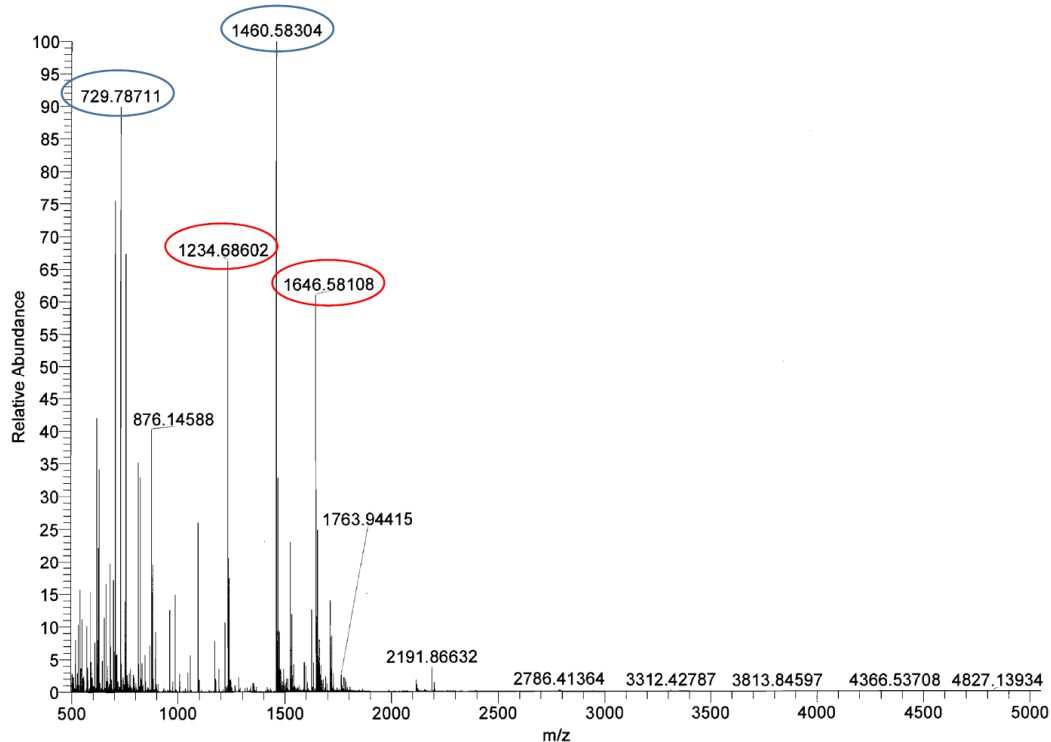

**Figure S3.** Mass spectrometry characterization of the Tm7 cleavage product. The peaks in red are the cyclic phosphate product from the 5'-fragment of the substrate (molecular weight = 4942.7, 3 and 4 charges for the two marked peaks), and the peaks in blue are from the 3'-fragment (molecular weight = 4384.7, 3 and 6 charges for the two marked peaks). These samples were prepared by reacting a non-labeled DNAzyme substrate with Tm7 or 17E DNAzymes at 1  $\mu$ M substrate and 1.5  $\mu$ M enzyme concentration in 50 mM MES buffer (pH 6) with 25 mM NaCl. Then the samples were desalted using a Sep-Pak column and dried. After rehydration in water to  $\sim$ 20  $\mu$ M substrate concentration, the samples were analyzed using an ESI mass spectrometer.

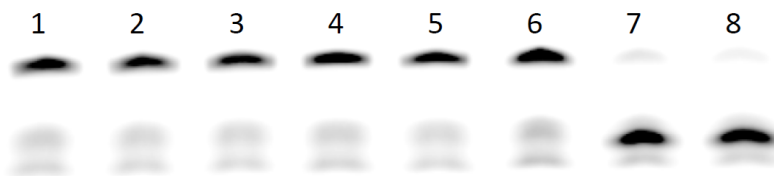

**Figure S4.** Tm7 and 17E cleavage of a RNA substrate (RNA-sub in Table S1 for sequence). Lane 1 is the substrate alone, and some degradation was observed. Lane 2 is the substrate with 10  $\mu$ M  $\text{Er}^{3+}$ . Lane 3 is the Tm7 DNAzyme complex without metal. Lane 4 is the complex with 10  $\mu$ M  $\text{Er}^{3+}$  for 30 min incubation. Lane 6 is the 17E DNAzyme complex without metal. Lane 7 and 8 are the 17E DNAzyme complex with 10  $\mu$ M  $\text{Pb}^{2+}$  after 30 and 60 min incubation. The 17E DNAzyme is known to cleave full RNA, and it serves as a positive control. Cleavage was observed only with the 17E DNAzyme, but not Tm7.

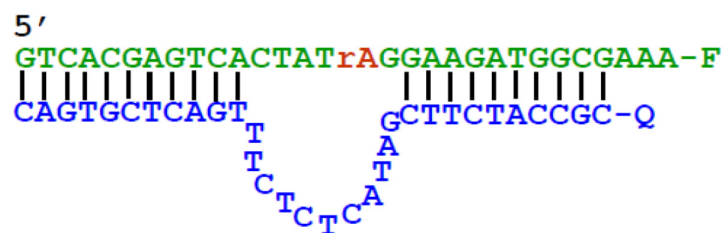

**Figure S5.** Catalytic beacon design using the Tm7 DNAzyme. F = FAM. Q = Iowa Black® FQ dark quencher.
